# Supplementary material
Source: PubMed Central journal article supplement (PMC7206114)

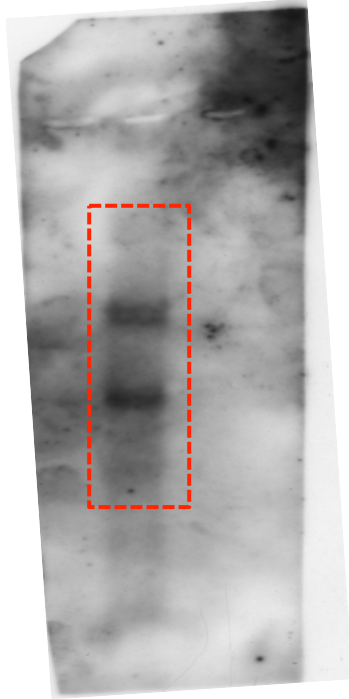

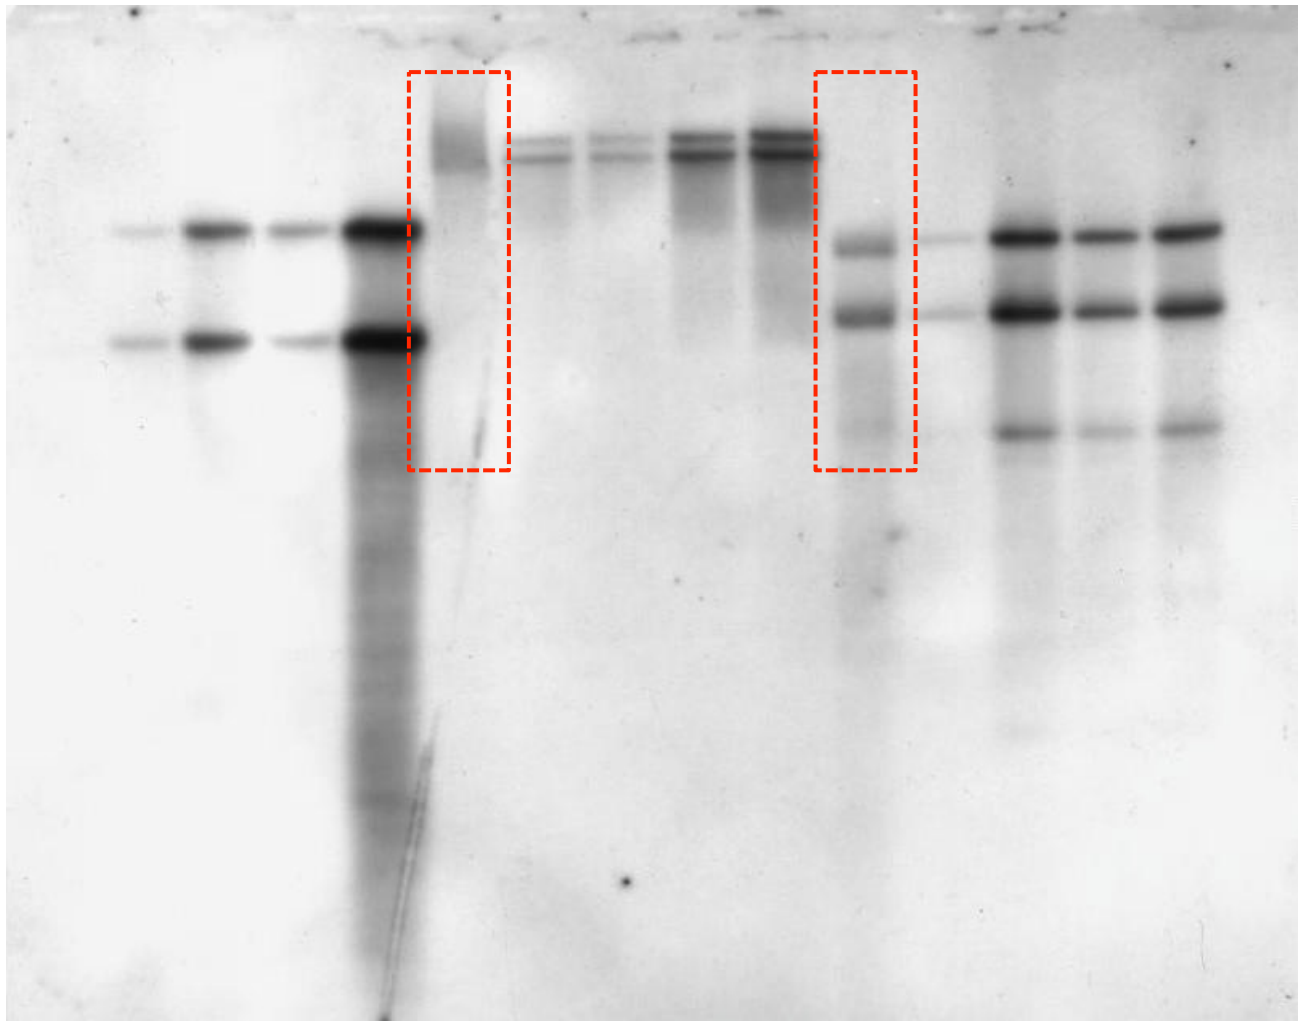

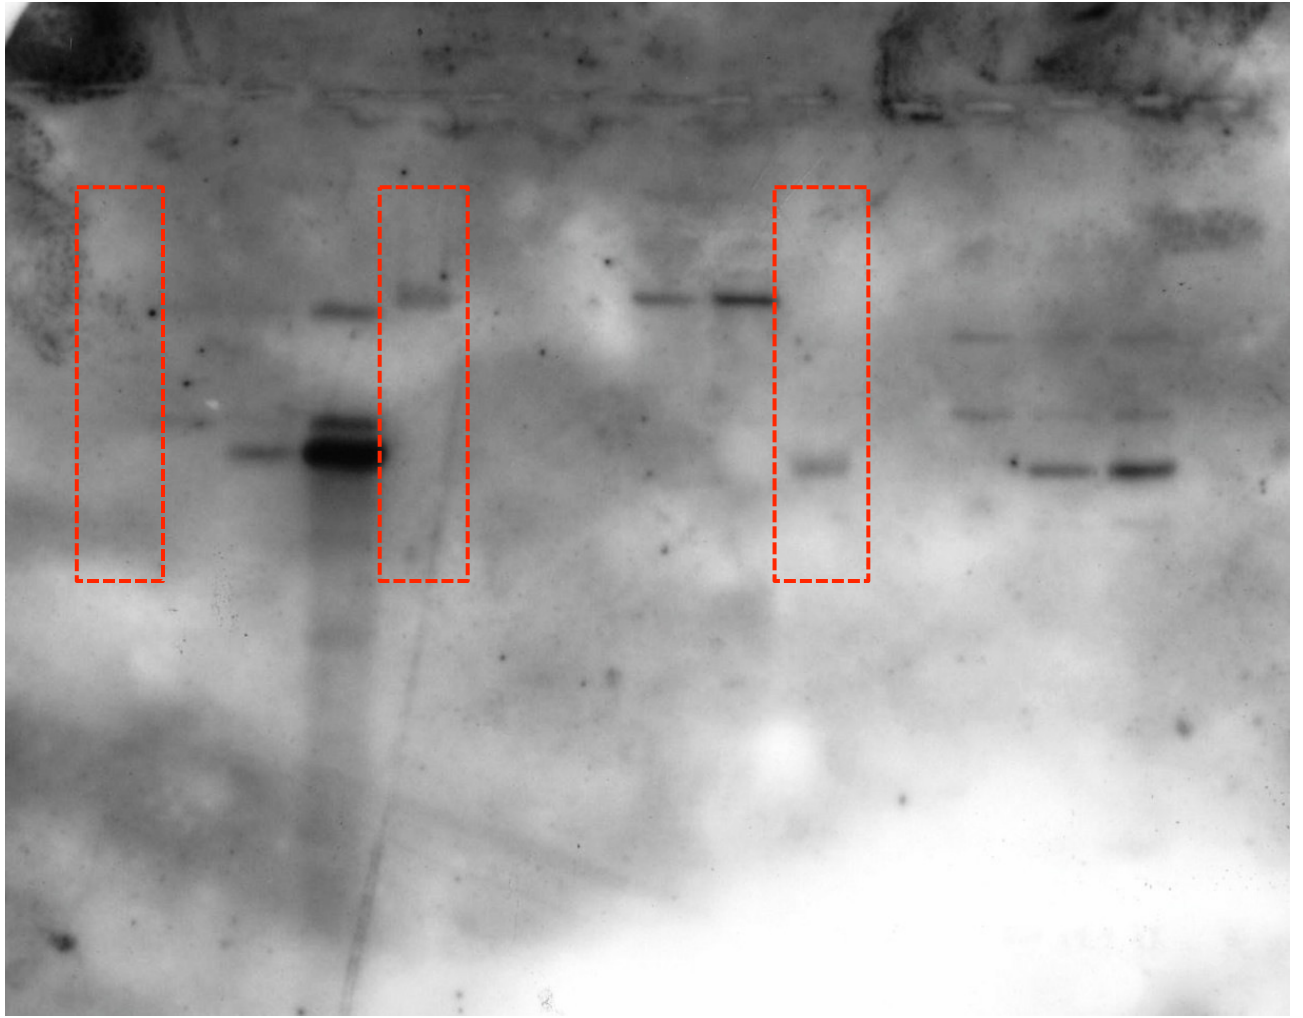

Supplement: 41418_2019_359_MOESM13_ESM.pdf [file 41418_2019_359_MOESM13_ESM.pdf]

~65KDa

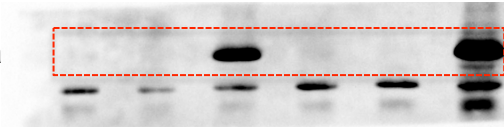

FLAG-Gm12794c

~25KDa

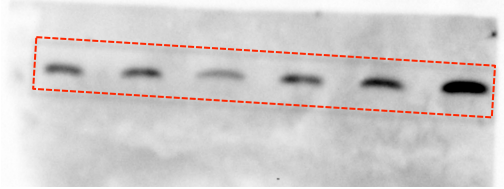

p21

Supplement: 41418_2019_359_MOESM14_ESM.pdf [file 41418_2019_359_MOESM14_ESM.pdf]

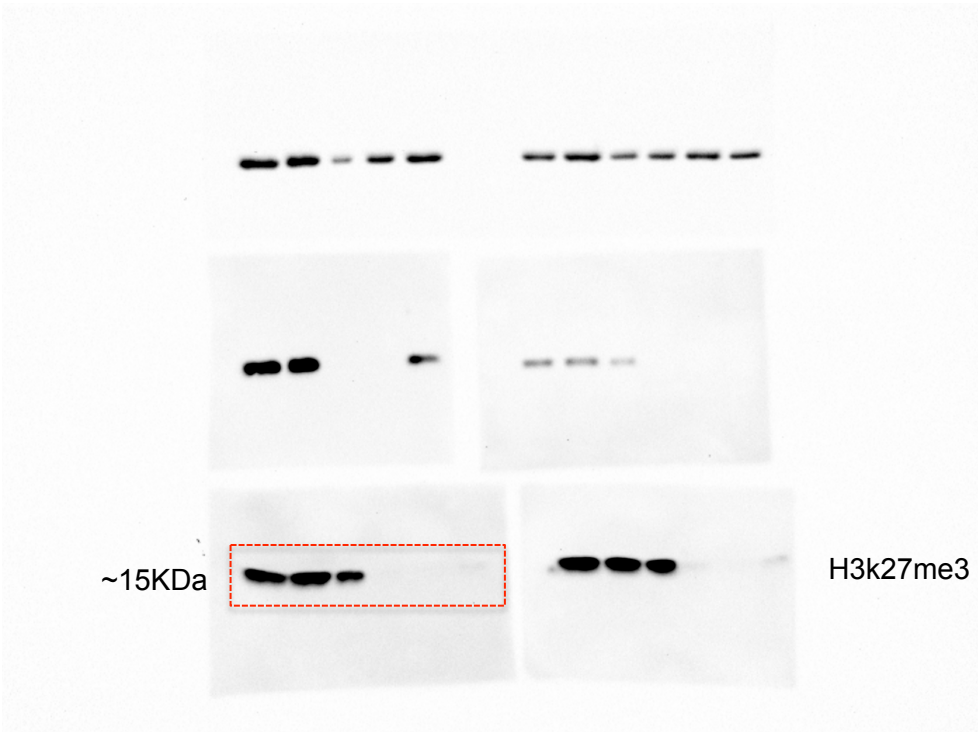

Supplement: 41418_2019_359_MOESM15_ESM.pdf [file 41418_2019_359_MOESM15_ESM.pdf]

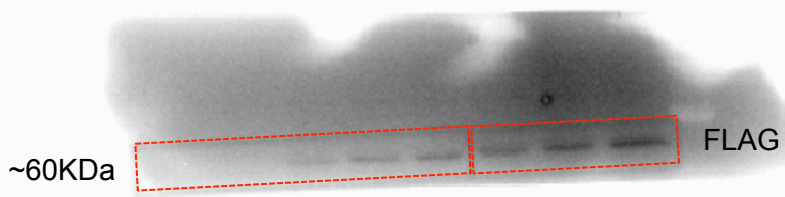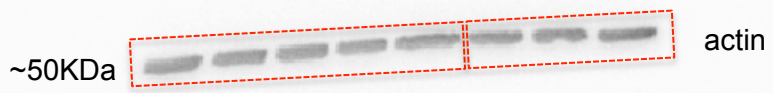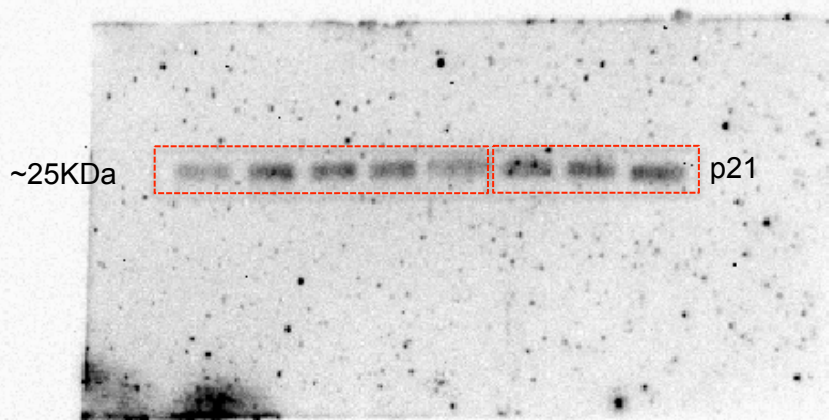

Supplement: 41418_2019_359_MOESM16_ESM.pdf [file 41418_2019_359_MOESM16_ESM.pdf]

~50KDa   act

~25KDa   p21

Supplement: 41418_2019_359_MOESM17_ESM.pdf [file 41418_2019_359_MOESM17_ESM.pdf]

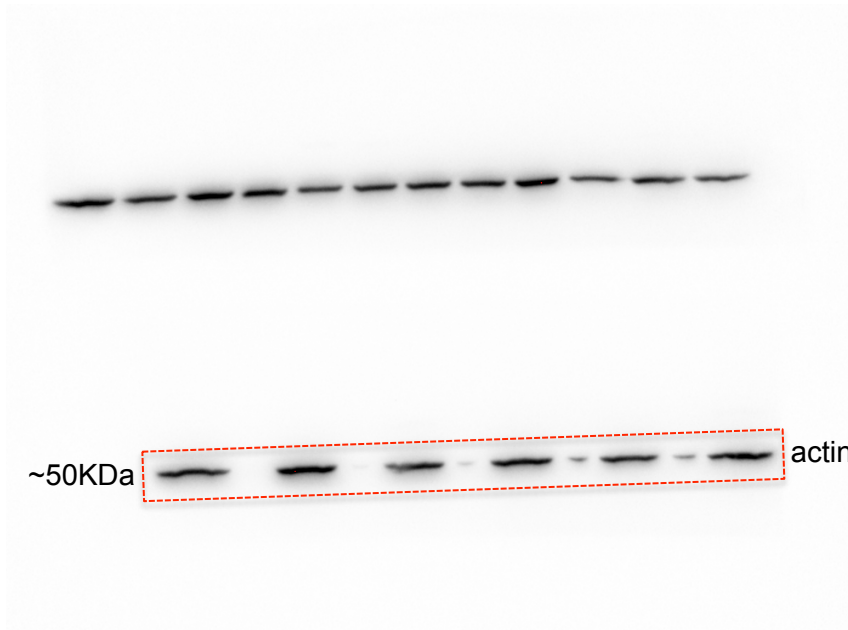

Supplement: 41418_2019_359_MOESM18_ESM.pdf [file 41418_2019_359_MOESM18_ESM.pdf]

~50KDa

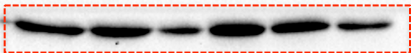

actin

~25KDa

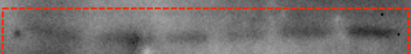

p21

Supplement: 41418_2019_359_MOESM19_ESM.pdf [file 41418_2019_359_MOESM19_ESM.pdf]
